# Supplementary material
Source: publisher site journal article supplement (https://www.dovepress.com/article/559514)
Supplement: Supplementary file 1 [file Supplementary%20Table%20for%20SPINE%20.docx]

**Supplementary Tables**

**Table S1** Sensitivity and Specificity of e-Health Tool and GPT-4 Compared to Multidisciplinary Team Assessment

|  | **e-Health tool** | **GPT-4** |
| --- | --- | --- |
|  | Scenario 1: Removing tentative decisions | |
| True positives | 51 | 43 |
| False positives | 0 | 0 |
| True negatives | 7 | 8 |
| False negatives | 2 | 17 |
| Sensitivity | 96.2% | 71.7% |
| Specificity | 100% | 100% |
|  | | Scenario 2: Treating tentative decisions as false negatives | |
| True positives | | 51 | 43 |
| False positives | | 0 | 0 |
| True negatives | | 7 | 8 |
| False negatives | | 34 | 42 |
| Sensitivity | | 60.0% | 50.6% |
| Specificity | | 100% | 100% |
|  | | Scenario 3: Treating tentative decisions as false positives | |
| True positives | | 51 | 43 |
| False positives | | 1 | 0 |
| True negatives | | 7 | 8 |
| False negatives | | 2 | 17 |
| Sensitivity | | 96.2% | 71.7% |
| Specificity | | 87.5% | 100% |
